# Supplementary material for: Bile Facilitates Human Norovirus Interactions with Diverse Histoblood Group Antigens, Compensating for Capsid Microvariation Observed in 2016–2017 GII.2 Strains
Source: PubMed Central journal article supplement (PMC7552067; doi:10.3390/v12090989), 2020-09-05
Supplement: viruses-12-00989-s001.pdf [file viruses-12-00989-s001.pdf]

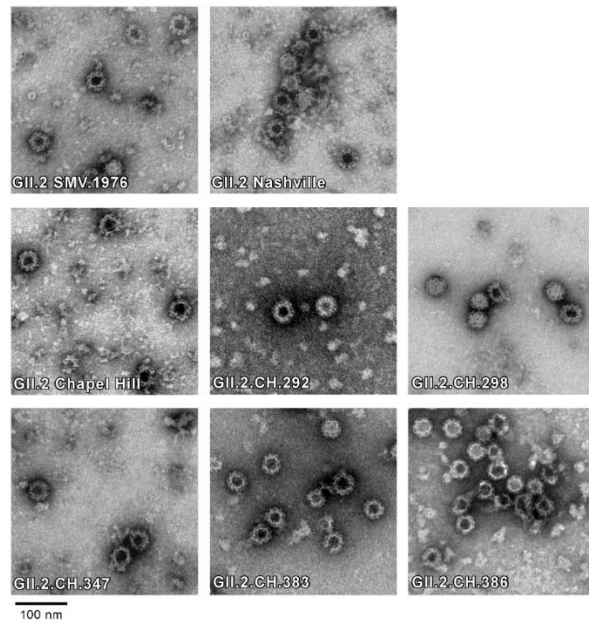

**Supplementary Figure S1.** Negative-stain electron micrographs of GII.2 virus-like particles.

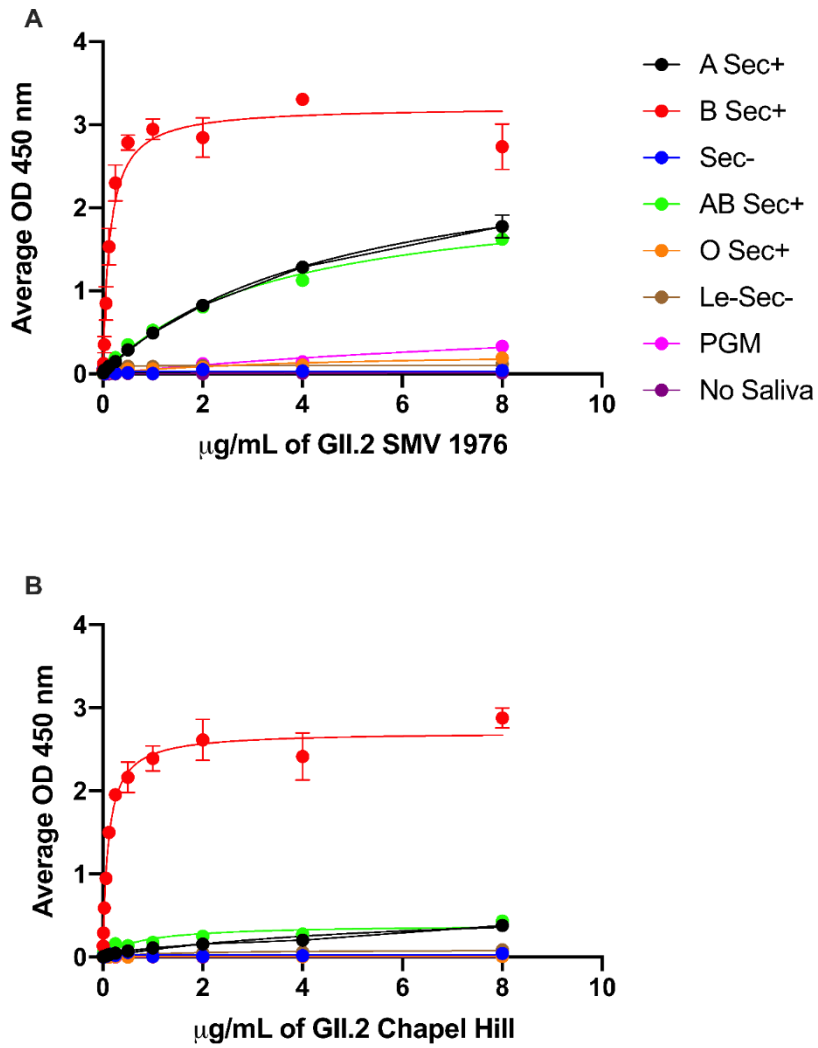

**Supplementary Figure S2.** GII.2 1976 SMV and GII.2 Chapel Hill Recognition of HBGA. GII.2 SMV 1976 (**A**) and GII.2 Chapel Hill (**B**) VLPs were titrated against archived saliva samples of known HBGA expression profile. One-site specific binding curves were fitted with error bars representing the standard error of the mean.

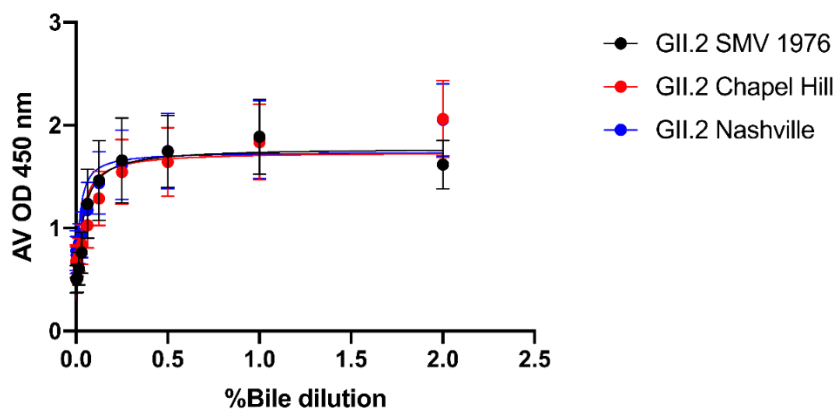

**Supplementary Figure S3.** Bile Enhances Binding of GII.2 VLP to HBGA.
